# Supplementary material
Source: Springer Nature journal article supplement (https://www.springermedizin.de/resource/supplementary/12874_2005_128_MOESM3_ESM.pdf/9433882)

# Systematic Reviews on DARE

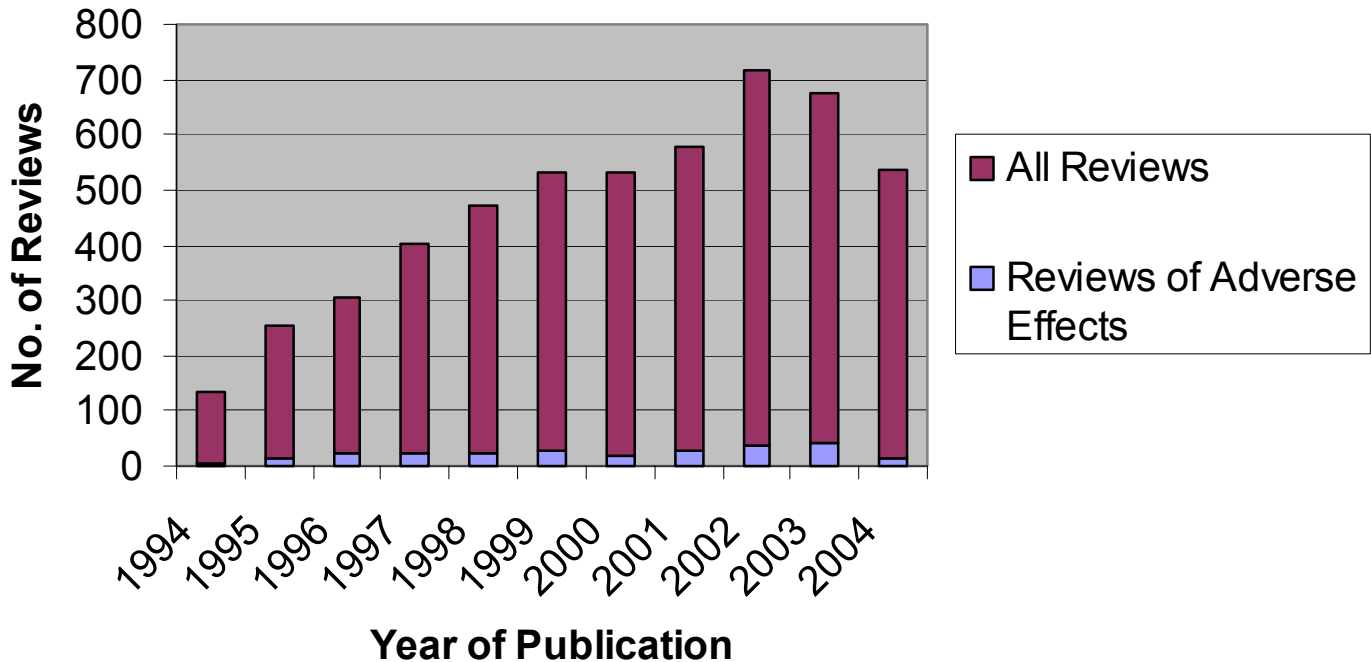

Supplement: MOESM3 [file 9433882]
